# Supplementary material for: MiRNA-Regulated Pathways for Hypertrophic Cardiomyopathy: Network-Based Approach to Insight into Pathogenesis
Source: MDPI journal article supplement (doi:10.3390/genes12122016), 2021-12-18
Supplement: s1 [file s1]

# Supplementary File 5:

## Estimation of the probability of obtaining the signaling pathways

### 1 The module pinpointed after the first iteration of the Greedy search

In the article, we show that 8 out of 12 miRNAs target three TGF-beta/SMAD signaling pathways:

$$TGF_{set} = \{(R-HSA-170834), (R-HSA-2173793), (R-HSA-2173796)\}$$

What is the probability that a pathway be connected with  $1, 2, 3, \dots, n$  miRNAs? Or in other words, what is the probability that a node have degree  $k$ , where  $k \in \{1, 2, \dots, n\}$ ? Each node has  $(n)$  tries to get edges. Each try is a success with probability  $p$ . The binomial distribution gives us the probability that a node has degree  $k$ :

$$Bin(n, k, p) = \binom{n}{k} * p^k * (1 - p)^{(n-k)}$$

where  $p$  for the  $pathway_i$  could be above estimate, as:

$$p_i = \frac{(number\ of\ miRNAs\ targeted\ the\ pathway_i)}{(number\ of\ miRNAs)}$$

Straightforward, that for our purposes the sentence "the  $n$  miRNAs target set of pathways" is equal to "each of the miRNAs targets at least one pathway from the set". Thus, for the  $TGF_{set}$  we could rewrite the  $p$  calculation as:

$$p_i = \frac{(number\ of\ miRNAs\ targeted\ at\ least\ one\ pathway\ from\ TGF_{set})}{(number\ of\ miRNAs)} = 0.35$$

Now, defining the  $p - value$  as the probability of getting  $k$  or more miRNAs targeting at least one pathway from  $TGF_{set}$ , we can calculate it as:

$$p - value = P(card\{miRNAs_{pathway_i}\} \geq 8) \sim Bin(12, 8, 0.35) = 0.0062$$

where:

$card$  is the cardinality of a set

$\{miRNAs_{pathway_i}\}$  is set of miRNAs targeted any  $pathway_i \in TGF_{set}$

## 2 The module pinpointed after the second iteration of the Greedy search

The second module consists of two pathway clusters: *first* – pathways linked to hsa-miR-1-3p and hsa-miR-497-5p *second* – pathways linked to hsa-miR-133a-3p and hsa-miR-199a-3p and two “*bottleneck*” pathways linked via hsa-miR-199a-3p to the first cluster and via hsa-miR-497-5p and hsa-miR-1-3p to the second cluster.

We repeated the above reasoning for each of these clusters:

$$p - value_{first} = P(card\{miRNAs_{pathway_i}\} \geq 2) \sim Bin(12, 2, 0.39) = 0.91$$

$$p - value_{second} = P(card\{miRNAs_{pathway_i}\} \geq 2) \sim Bin(12, 2, 0.17) = 0.35$$

$$p - value_{bottleneck} = P(card\{miRNAs_{pathway_i}\} \geq 3) \sim Bin(12, 3, 0.23) = 0.11$$

And we calculated the p-value for the all module with Bonferroni correction for 3 tests as:

$$p - value_{module} = (p - value_{first} * p - value_{second} * p - value_{bottleneck}) * 3 = 0.11$$

## 3 Code available

[https://github.com/GJOsmak/miRNET\\_HCM/Code/pathway\\_test.ipynb](https://github.com/GJOsmak/miRNET_HCM/Code/pathway_test.ipynb)
