# Supplementary material for: MiRNA-Regulated Pathways for Hypertrophic Cardiomyopathy: Network-Based Approach to Insight into Pathogenesis
Source: Genes (Basel). 2021 Dec 18;12(12):2016. doi: 10.3390/genes12122016 (PMC8701189; doi:10.3390/genes12122016)
Supplement: Supplementary file 1 [file genes-12-02016-s001.zip]

Archive with 7 entries (7 files):
- Suppl_4.pdf
- Suppl_4.tex
- Suppl_5.pdf
- Suppl_5.tex
- Suppl_6.pdf
- Suppl_7.pdf
- Suppl_Tab_1.pdf
