# Supplementary material for: MiRNA-Regulated Pathways for Hypertrophic Cardiomyopathy: Network-Based Approach to Insight into Pathogenesis
Source: Genes (Basel). 2021 Dec 18;12(12):2016. doi: 10.3390/genes12122016 (PMC8701189; doi:10.3390/genes12122016)
Supplement: Supplementary file 1 [file genes-12-02016-s001.zip › Suppl_5.tex]

\documentclass[a4paper, 12pt]{article}
\usepackage{cmap}
\usepackage{mathtools}
\usepackage{amsmath}
\usepackage{fixltx2e}
\usepackage{float}
\usepackage{tabularx}
\usepackage{hyperref}
\hypersetup{
	colorlinks=true,
	linkcolor=blue,
	filecolor=magenta,      
	urlcolor=cyan,
	pdftitle={Overleaf Example},
	pdfpagemode=FullScreen,
}

\title{Supplementary File 5: 
	\\Estimation of the probability of obtaining the signaling pathways}
\date{}
\begin{document}
	\maketitle
	
\section{The module pinpointed after the first \mbox{iteration} of the Greedy search}

	In the article, we show that 8 out of 12 miRNAs target three  TGF-beta/SMAD signaling pathways:
	
	\begin{displaymath}
		TGF_{set} = \{(R-HSA-170834), (R-HSA-2173793), (R-HSA-2173796)\}
	\end{displaymath}
	
	What is the probability that a pathway be connected with $1,2,3,…,n$ miRNAs? Or in other words, what is the probability that a node heve degree k, where $k \in \{1,2,..,n\}$? Each node has (n) tries to get edges. Each try is a success with probability p. The binomial distribution gives us the probability that a node has degree k:
	
		\begin{displaymath}
		Bin(n,k,p)=\binom{n}{k}*p^k*(1-p)^{(n-k)}
		\end{displaymath}
	
	where $p$ for the $pathway_{i}$ could be above estimate, as:
	
		\begin{displaymath}
		p_i=\frac{(number\;of\;miRNAs\;targeted\;the\;pathway_i)}{(number\;of\;miRNAs)}
		\end{displaymath}
	
	 Straightforward, that for our purposes the sentence "the $n$ miRNAs target set of pathways" is equal to "each of the miRNAs targets at least one pathway from the set". Thus, for the $TGF_{set}$ we could rewrite the $p$ calculation as:
	 
	 \begin{displaymath}
	 	p_i=\frac{(number\;of\;miRNAs\;targeted\;at\;least\;one\;pathway\;from\;TGF_{set})}{(number\;of\;miRNAs)}=0.35
	 \end{displaymath}
	 
	Now, defining the $p-value$ as the probability of getting $k$ or more \mbox{miRNAs} targeting at least one pathway from $TGF_{set}$, we can calculate it as:
	
	\begin{displaymath}
		p-value = P(card\{miRNAs_{pathwai_i}\} \geq 8) \sim Bin(12, 8, 0.35)=0.0062
	\end{displaymath}
where:
\begin{description}
	\item[$card$] is the cardinality of a set
	\item[$\{miRNAs_{pathwai_i}\}$] is set of miRNAs targeted any $pathway_i \in TGF_{set}$
\end{description}

\section{The module pinpointed after the second \mbox{iteration} of the Greedy search}

	The second module consists of two pathway clusters: 
	$first$ – pathways linked to hsa-miR-1-3p and hsa-miR-497-5p 
	$second$ – pathways linked to hsa-miR-133a-3p and hsa-miR-199a-3p 
	and two “$bottleneck$” pathways linked via hsa-miR-199a-3p to the first cluster and via hsa-miR-497-5p and hsa-miR-1-3p to the second cluster.
	
	We repeated the above reasoning for each of these clusters:
	\[p-value_{first} = P(card\{miRNAs_{pathwai_i}\} \geq 2) \sim Bin(12, 2, 0.39)=0.91\]
	\[p-value_{second} = P(card\{miRNAs_{pathwai_i}\} \geq 2) \sim Bin(12, 2, 0.17)=0.35\]
	\[p-value_{bottleneck}= P(card\{miRNAs_{pathwai_i}\} \geq 3) \sim Bin(12, 3, 0.23)=0.11\]

	And we calculated the p-value for the all module with Bonferroni correction for 3 tests as:
	\[p-value_{module}= (p-value_{first} * p-value_{second} * p-value_{bottleneck})*3=0.11\]

\section{Code available}

\url{https://github.com/GJOsmak/miRNET_HCM/Code/pathway_test.ipynb}

\end{document}
